# Supplementary material for: Family Member, Best Friend, Child or ‘Just’ a Pet, Owners’ Relationship Perceptions and Consequences for Their Cats
Source: MDPI journal article supplement (doi:10.3390/ijerph19010193), 2021-12-24
Supplement: s1 [file s1]

## Supplementary figures and tables

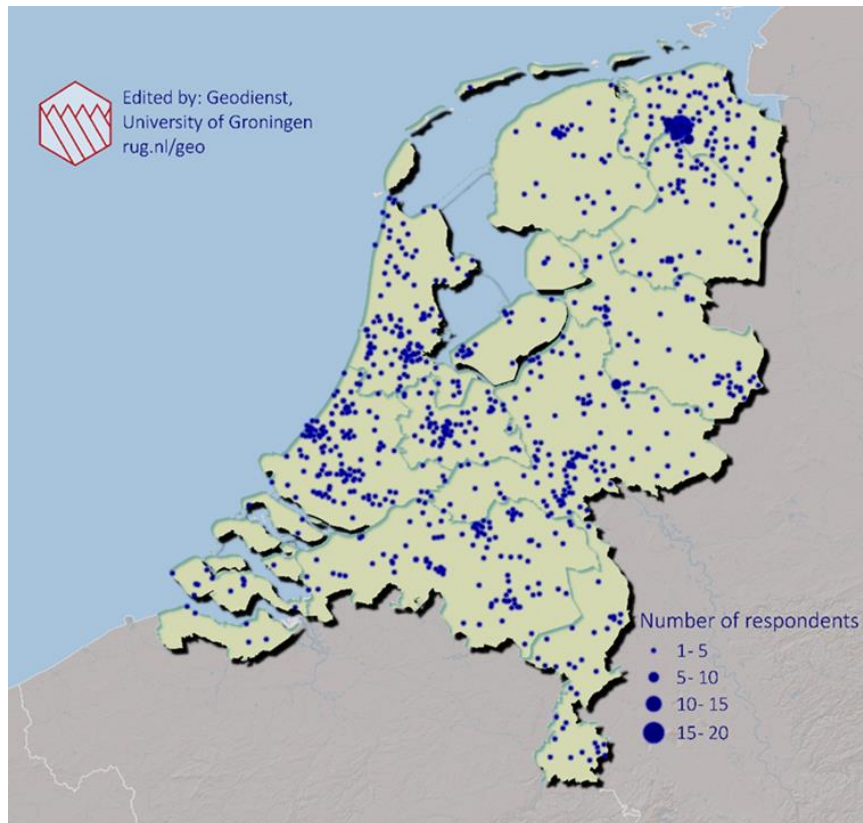

Figure S1. Distribution of respondents over the Netherlands

Table S1a. Hypotheses regarding owner and cat characteristics

|               | Gender | Age group*   | Owners social living situation* | Pedigree*     |
|---------------|--------|--------------|---------------------------------|---------------|
| Family member |        |              | family, couple                  |               |
| Child         | women  |              | <b>single</b>                   | <b>likely</b> |
| Best friend   | men    |              | <b>single</b>                   |               |
| Pet           | men    | <b>older</b> |                                 | <b>no</b>     |

Table S1b. Hypotheses regarding relationship aspects

|               | Equal to family*  | Empathetic | Loyal | Dependent on owner for love and care* | Important source of support and companionship* |
|---------------|-------------------|------------|-------|---------------------------------------|------------------------------------------------|
| Family member | yes               |            |       | <b>to some extent</b>                 | no                                             |
| Child         | no, authoritarian | yes        |       | <b>yes</b>                            | <b>yes</b>                                     |
| Best friend   | <b>yes</b>        | yes        | yes   | to some extent                        | <b>yes</b>                                     |
| Pet           | <b>no</b>         | no         | no    | <b>hardly</b>                         | <b>no</b>                                      |

Table S1c. Hypotheses regarding the cat's living environment

|               | Bedroom access** | Sleep on bed with owner | Care in owner's absence** | Outdoor access**        |
|---------------|------------------|-------------------------|---------------------------|-------------------------|
| Family member | yes              |                         |                           | <b>yes</b>              |
| Child         | <b>yes</b>       |                         | boarding/prof cat sitter  | <b>no or restricted</b> |
| Best friend   | <b>yes</b>       | yes                     |                           | yes                     |
| Pet           | <b>no</b>        | no                      | neighbors/friends         | <b>yes</b>              |

Notes: \* Significant determinants for relationship perception, \*\* Significantly different between relationship categories, **Bold**: hypothesis confirmed by results.

Table S2. Descriptives by group

|                            |                   | Family |     | Child |     | Best friend |     | Pet |     | Total sample |     | Group difference            |
|----------------------------|-------------------|--------|-----|-------|-----|-------------|-----|-----|-----|--------------|-----|-----------------------------|
| Owner characteristics      |                   | n      | %   | n     | %   | n           | %   | n   | %   | n            | %   | X2 (df), p-value            |
| Gender                     | Female            | 857    | 91  | 468   | 95  | 96          | 88  | 205 | 81  | 1626         | 91  | X2 (1797,3) = 42.41, <0.001 |
| Age                        | < 35              | 254    | 27  | 218   | 44  | 33          | 30  | 50  | 19  | 555          | 31  | X2 (1803,6) = 66.36, <0.001 |
|                            | 35-55             | 505    | 54  | 206   | 42  | 54          | 50  | 144 | 56  | 909          | 50  |                             |
|                            | > 55              | 184    | 20  | 69    | 14  | 22          | 20  | 64  | 25  | 339          | 19  |                             |
| Education                  | low               | 96     | 11  | 63    | 13  | 22          | 21  | 18  | 7   | 199          | 11  | X2 (1747,6) = 55.09, <0.001 |
|                            | middle            | 306    | 33  | 201   | 43  | 43          | 41  | 63  | 25  | 613          | 35  |                             |
|                            | high              | 515    | 56  | 206   | 44  | 40          | 38  | 170 | 68  | 931          | 53  |                             |
| Cat professional           | yes               | 97     | 10  | 53    | 11  | 15          | 14  | 16  | 6   | 181          | 10  | X2 (1788,3) = 6.34, 0.10    |
| Owners' social environment |                   | n      | %   | n     | %   | n           | %   | n   | %   | n            | %   | X2/F (df), p-value          |
| Living alone               | yes               | 156    | 17  | 146   | 39  | 46          | 42  | 47  | 19  | 395          | 22  | X2 (1799,3) = 30.99, <0.001 |
| Presence of cats           | one               | 342    | 36  | 140   | 28  | 48          | 44  | 123 | 48  | 653          | 36  | X2 (1803,3) = 61.27, <0.001 |
|                            | two               | 340    | 36  | 206   | 42  | 31          | 28  | 93  | 36  | 670          | 37  |                             |
|                            | three             | 125    | 13  | 77    | 16  | 11          | 10  | 29  | 11  | 242          | 14  |                             |
|                            | > three           | 133    | 14  | 70    | 14  | 19          | 17  | 12  | 5   | 234          | 13  |                             |
| Average # cats (mean, sd)  |                   | 2.3    | 1.8 | 2.4   | 1.7 | 2.3         | 1.9 | 1.9 | 1.7 | 2.3          | 1.8 | F (1798,3) = 4.46, 0.004    |
| Cat characteristics        |                   | n      | %   | n     | %   | n           | %   | n   | %   | n            | %   | X2 (df), p-value            |
| Pedigree                   | yes               | 293    | 31  | 203   | 41  | 35          | 32  | 43  | 17  | 574          | 32  | X2 (1803,3) = 47.44, <0.001 |
|                            | British Shorthair | 74     | 25  | 51    | 25  | 10          | 29  | 11  | 26  | 146          | 25  |                             |
|                            | Ragdoll           | 67     | 23  | 49    | 24  | 8           | 23  | 5   | 12  | 129          | 23  |                             |
|                            | Maine Coon        | 34     | 12  | 23    | 11  | 4           | 11  | 7   | 16  | 68           | 12  |                             |
|                            | Siamese           | 21     | 7   | 16    | 8   | 4           | 11  | 4   | 9   | 45           | 8   |                             |
|                            | Norw. Forest Cat  | 13     | 4   | 6     | 3   | 2           | 6   | 1   | 2   | 22           | 4   |                             |
|                            | Persian           | 10     | 3   | 5     | 3   | 2           | 6   | 1   | 2   | 18           | 3   |                             |
|                            | Other breed       | 72     | 25  | 53    | 26  | 5           | 14  | 14  | 33  | 144          | 25  |                             |
| Age                        | < 5 yrs           | 388    | 41  | 267   | 54  | 43          | 40  | 102 | 40  | 800          | 44  | X2 (1802) = 29.23, <0.001   |
|                            | 5-10 yrs          | 297    | 32  | 127   | 26  | 35          | 32  | 78  | 30  | 537          | 40  |                             |
|                            | 10-15 yrs         | 189    | 20  | 73    | 15  | 23          | 21  | 53  | 21  | 338          | 19  |                             |
|                            | > 15 yrs          | 69     | 7   | 26    | 5   | 7           | 7   | 25  | 10  | 127          | 7   |                             |

|           |        |     |    |     |    |     |    |     |    |      |    |                            |
|-----------|--------|-----|----|-----|----|-----|----|-----|----|------|----|----------------------------|
| As kitten | yes    | 409 | 43 | 203 | 41 | 37  | 34 | 105 | 41 | 754  | 42 | X2 (1803,3) = 3.93, 0.269  |
| First cat | yes    | 173 | 18 | 129 | 26 | 20  | 18 | 58  | 23 | 380  | 21 | X2 (1803,3) = 12.70, 0.005 |
| Sex cat   | female | 430 | 46 | 237 | 48 | 37  | 34 | 130 | 50 | 834  | 46 | X2 (1803,3) = 9.24, 0.026  |
| Neutered  | yes    | 851 | 90 | 452 | 92 | 100 | 92 | 243 | 94 | 1646 | 91 | X2 (1803,3) = 4.14, 0.246  |

| Cat's social behaviour |              | n   | %  | n   | %  | n   | %  | n   | %  | n    | %  | X2 (df), p-value            |
|------------------------|--------------|-----|----|-----|----|-----|----|-----|----|------|----|-----------------------------|
| Allows stroking        | often/always | 913 | 97 | 465 | 94 | 105 | 96 | 238 | 92 | 1721 | 96 | X2 (1797,3) = 18.37, <0.001 |
| Allows lifting         | often/always | 733 | 89 | 399 | 84 | 88  | 60 | 185 | 72 | 1409 | 78 | X2 (1803,3) = 11.81, 0.008  |
| Voluntary on lap       | yes          | 741 | 79 | 387 | 79 | 78  | 72 | 197 | 76 | 1403 | 78 | X2 (1803,3) = 3.24, 0.356   |

| Cats' environment |                         | n   | %  | n   | %  | n  | %  | n   | %  | n    | %  | X2 (df), p-value              |
|-------------------|-------------------------|-----|----|-----|----|----|----|-----|----|------|----|-------------------------------|
| Outdoor access    | yes                     | 643 | 68 | 258 | 52 | 65 | 60 | 204 | 79 | 1217 | 66 | X2 (3,1803) = 62.71, <0.001   |
| How               | Catflap always open     | 194 | 30 | 57  | 22 | 22 | 34 | 83  | 41 | 369  | 30 | X2 (6,1170) = 24.87, <0.001   |
|                   | Catflap time restricted | 70  | 11 | 34  | 13 | 8  | 12 | 9   | 4  | 125  | 10 |                               |
|                   | Let in/out by person    | 379 | 59 | 167 | 65 | 35 | 54 | 112 | 55 | 723  | 60 |                               |
| Where             | Everywhere              | 409 | 66 | 115 | 46 | 29 | 47 | 159 | 83 | 741  | 64 | X2 (9,1120) = 79.00, <0.001   |
|                   | Balcony                 | 33  | 5  | 29  | 12 | 4  | 6  | 9   | 5  | 82   | 7  |                               |
|                   | Fenced yard             | 148 | 24 | 84  | 34 | 22 | 36 | 22  | 11 | 282  | 24 |                               |
|                   | Catio                   | 28  | 5  | 20  | 8  | 7  | 11 | 2   | 1  | 57   | 5  |                               |
| Access to bedroom | yes                     | 490 | 52 | 355 | 72 | 78 | 72 | 94  | 36 | 1017 | 57 | X2 (23,1753) = 159.23, <0.001 |
| Sleeps on bed     | yes                     | 423 | 87 | 319 | 90 | 70 | 89 | 75  | 80 | 887  | 88 |                               |
| Care when away    | Paid sitter             | 46  | 5  | 23  | 5  | 5  | 5  | 9   | 4  | 87   | 5  |                               |
|                   | Boarding                | 37  | 4  | 17  | 4  | 4  | 4  | 9   | 4  | 68   | 4  |                               |
|                   | Friends/neighbours      | 663 | 71 | 326 | 67 | 66 | 61 | 199 | 78 | 1292 | 71 |                               |
|                   | Combination of options  | 85  | 9  | 36  | 7  | 5  | 5  | 15  | 6  | 148  | 8  |                               |
|                   | Never absent            | 98  | 11 | 82  | 17 | 27 | 25 | 21  | 8  | 233  | 13 |                               |

| Relationship indicators |  | mean | sd  | F (df), p-value              |
|-------------------------|--|------|-----|------|-----|------|-----|------|-----|------|-----|------------------------------|
| Company                 |  | 4.5  | 0.6 | 4.7  | 0.5 | 4.5  | 0.7 | 4.2  | 0.8 | 4.5  | 0.6 | F (3,1788) = 32.06, < 0.001  |
| Dependency              |  | 3.0  | 1.1 | 3.8  | 1.1 | 3.5  | 1.2 | 2.3  | 1.0 | 3.1  | 1.2 | F (3,1767) = 101.89, < 0.001 |
| Empathy                 |  | 3.5  | 1.0 | 4.0  | 1.0 | 4.0  | 1.0 | 2.9  | 1.1 | 3.6  | 1.1 | F (3,1717) = 68.22, < 0.001  |
| Equality                |  | 2.7  | 1.1 | 3.5  | 1.2 | 3.4  | 1.2 | 1.9  | 0.9 | 2.9  | 1.3 | F (3,1744) = 120.42, < 0.001 |

|         |     |     |     |     |     |     |     |     |     |     |                              |
|---------|-----|-----|-----|-----|-----|-----|-----|-----|-----|-----|------------------------------|
| Loyalty | 3.3 | 1.1 | 4.1 | 1.0 | 4.1 | 0.9 | 2.6 | 1.0 | 3.5 | 1.1 | F (3,1752) = 138.18, < 0.001 |
| Purpose | 3.1 | 1.1 | 3.8 | 1.1 | 3.8 | 1.0 | 2.4 | 1.0 | 3.3 | 1.2 | F (3,1796) = 111.15, < 0.001 |
| Support | 4.0 | 0.8 | 4.5 | 0.7 | 4.5 | 0.6 | 3.3 | 1.1 | 4.1 | 0.9 | F (3,1773) = 155.32, < 0.001 |

---
